# Supplementary material
Source: PubMed Central journal article supplement (PMC3056580)
Supplement: supp_jn.110.134353_nut134353_T01.pdf [file supp_jn.110.134353_nut134353_T01.pdf]

## Online Supporting Materials

**Supplemental Table 1.** Partial correlations between dietary fatty acid intakes and plasma homocysteine in 880 participants of the Boston Puerto Rican Health Study

---

| Dietary fatty acid intake   | Std. coeff. <sup>1</sup> | <i>P</i> <sup>2</sup> |
|-----------------------------|--------------------------|-----------------------|
| (n-3):(n-6) PUFA            | -0.12                    | 0.009                 |
| (n-3)PUFA, % <i>energy</i>  | -0.12                    | 0.022                 |
| (n-6) PUFA, % <i>energy</i> | 0.02                     | 0.56                  |
| Total PUFA, % <i>energy</i> | 0.01                     | 0.75                  |
| Total MUFA, % <i>energy</i> | 0.04                     | 0.29                  |
| Total SFA, % <i>energy</i>  | 0.04                     | 0.23                  |

---

<sup>1</sup>Std. coef.=Standardized coefficient.

<sup>2</sup>Adjusted for age, sex, smoking, alcohol drinking, BMI, diabetes, population admixture, plasma folate, plasma vitamin B-12, plasma pyridoxal phosphate, and dietary total fat.

## Online Supporting Materials

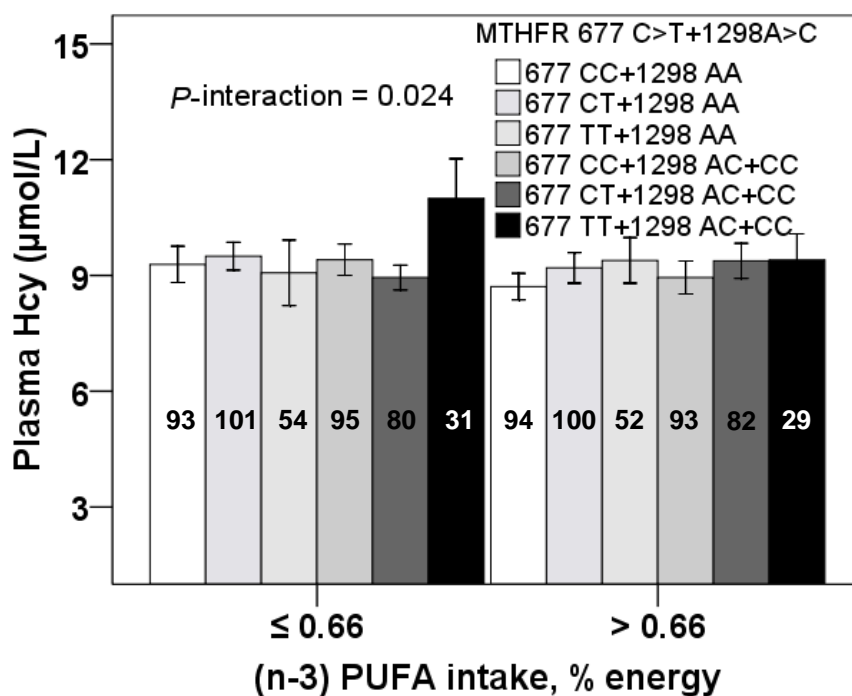

**Supplemental Figure 1. Interaction between genotypes of two *MTHFR* SNP, 677C>T and 1298A>C, and (n-3) PUFA intake on plasma homocysteine.** The sample size of each genotype is indicated inside each bar. Values are expressed as adjusted means  $\pm$  SEM.
